# Supplementary material for: A New Advanced and Validated Method for the Determination of Potentially Toxic Metals and Trace and Ultra-Trace Elements in Peritoneal Fluid to Assess the Health Risks of Women with Gynecological Pathologies
Source: MDPI journal article supplement (doi:10.3390/toxics11050399), 2023-04-23
Supplement: s1 [file s1]

**Table 1.** ICP-MS/MS operating conditions.

| Parameter                                                                                                                                                                                                                                                                                                                                                                  | Values |
|----------------------------------------------------------------------------------------------------------------------------------------------------------------------------------------------------------------------------------------------------------------------------------------------------------------------------------------------------------------------------|--------|
| RF Power (kW)                                                                                                                                                                                                                                                                                                                                                              | 1.55   |
| Plasma flow (L min <sup>-1</sup> )                                                                                                                                                                                                                                                                                                                                         | 15     |
| Auxiliary flow (L min <sup>-1</sup> )                                                                                                                                                                                                                                                                                                                                      | 1      |
| Nebulizer flow (L min <sup>-1</sup> )                                                                                                                                                                                                                                                                                                                                      | 0.8    |
| Makeup gas (L min <sup>-1</sup> )                                                                                                                                                                                                                                                                                                                                          | 0.3    |
| Spray chamber Temperature (°C)                                                                                                                                                                                                                                                                                                                                             | -5     |
| Sampling depth (mm)                                                                                                                                                                                                                                                                                                                                                        | 8      |
| Liquid flow (μL min <sup>-1</sup> )                                                                                                                                                                                                                                                                                                                                        | 100    |
| Scan type                                                                                                                                                                                                                                                                                                                                                                  | MS/MS  |
| Replicates                                                                                                                                                                                                                                                                                                                                                                 | 6      |
| Collision gas flow rate (mL min <sup>-1</sup> )                                                                                                                                                                                                                                                                                                                            | 3      |
| Sweeps                                                                                                                                                                                                                                                                                                                                                                     | 10     |
| <b>Measured isotopes</b>                                                                                                                                                                                                                                                                                                                                                   |        |
| <sup>75</sup> As, <sup>137</sup> Ba, <sup>209</sup> Bi, <sup>111</sup> Cd, <sup>59</sup> Co, <sup>52</sup> Cr, <sup>63</sup> Cu, <sup>56</sup> Fe, <sup>139</sup> La, <sup>7</sup> Li, <sup>55</sup> Mn, <sup>95</sup> Mo, <sup>60</sup> Ni, <sup>208</sup> Pb, <sup>85</sup> Rb, <sup>118</sup> Sn, <sup>88</sup> Sr, <sup>47</sup> Ti, <sup>51</sup> V, <sup>68</sup> Zn |        |
| <b>Internal standard isotopes</b>                                                                                                                                                                                                                                                                                                                                          |        |
| <sup>72</sup> Ge, <sup>185</sup> Re, <sup>103</sup> Rh, <sup>45</sup> Sc                                                                                                                                                                                                                                                                                                   |        |
